# Supplementary material for: Changes in Trunk Variability and Stability of Gait in Patients with Chronic Low Back Pain: Impact of Laboratory Versus Daily-living Environments
Source: Research Square preprint supplement (doi:10.21203/rs.3.rs-127066/v1), 2020-12-16
Supplement: Supplementary file 1 [file c818daa6c474febad6d81e4f.xlsx]

## Sheet: Sheet1
	Healthy control (HC) (n = 20)	Low back pain (LBP) (n = 20)
Age (year)	56.75 (±9.43)	54.05 (±10.76)
Gender (M:F)	12; 8	11; 9
Pain NRS (0-10)	－	4.40 (±1.32)
Duration (months)	－	23.65 (±17.42)
TSK-11(11-44)	－	22.05 (±6.61)
RMDQ (0-24)	－	4.60 (±2.91)
