# Supplementary material for: Changes in Trunk Variability and Stability of Gait in Patients with Chronic Low Back Pain: Impact of Laboratory Versus Daily-living Environments
Source: Research Square preprint supplement (doi:10.21203/rs.3.rs-127066/v1), 2020-12-16
Supplement: Supplementary file 2 [file d85a0b9806668995e73a080d.xlsx]

## Sheet: Sheet1
		Antero-posterior (AP)																					Medio-lateral (ML)
		Environments							Group							Interaction							Environments							Group				Interaction
		F		p		ηp2			F		p		ηp2			F		p		ηp2			F		p			ηp2		F	p	ηp2		F	p	ηp2
SD		1.79		0.19		0.05			9.49		<0.01		0.2			0.11		0.74		0			4.22		<0.05		0.1			9.13	<0.01	0.2		0.03	0.86	0
MSE	τ=1	0		0.97		0			0.29		0.59		0.01			0.13		0.72		0			0.6		0.44		0.02			12.47	<0.01	0.25		3.06	0.09	0.07
	τ=2	0.47		0.5		0.01			0.08		0.77		0.002			0.92		0.34		0.02			4.3		<0.05		0.1			17.83	<0.01	0.32		6.58	<0.05	0.15
	τ=3	0.85		0.36		0.02			0.65		0.43		0.02			1.33		0.26		0.03			5.08		<0.05		0.12			24.44	<0.01	0.39		6.8	<0.05	0.15
	τ=4	0.79		0.38		0.02			1.13		0.3		0.03			1.15		0.29		0.03			5.5		<0.05		0.13			26.15	<0.01	0.41		6.83	<0.05	0.15
	τ=5	1.01		0.32		0.03			2.5		0.12		0.03			1.26		0.27		0.03			4.63		<0.05		0.11			25.24	<0.01	0.4		6.69	<0.05	0.15
	τ=6	0.69		0.41		0.02			3.71		0.06		0.09			0.79		0.38		0.02			4.77		<0.05		0.11			21.54	<0.01	0.36		5.84	<0.05	0.13
LyE		4.57		<0.05		0.11			13.01		<0.01		0.26			0.06		0.81		0			1.81		0.19		0.05			0.04	0.84	0		0.33	0.57	0.01
		The post hoc analysis
		Between Environment														Between Group
		HC							LBP							Lab							Daily living
		p			d				p			d				p			d				p			d
MSE of ML	τ=2	0.99			0				<0.01			1.04				0.19			0.52				<0.01			1.56
	τ=3	0.88			0.05				<0.01			1.09				0.06			0.69				<0.01			1.73
	τ=4	0.92			0.03				<0.01			1.1				<0.05			0.71				<0.01			1.78
	τ=5	0.94			0.03				<0.01			1.07				<0.05			0.75				<0.01			1.79
	τ=6	0.87			0.05				<0.01			1.01				<0.05			0.73				<0.01			1.69
